# Supplementary material
Source: MDPI journal article supplement (https://www.mdpi.com/2073-4441/13/2/157)
Supplement: s1 [file s1]

## Supplementary Material

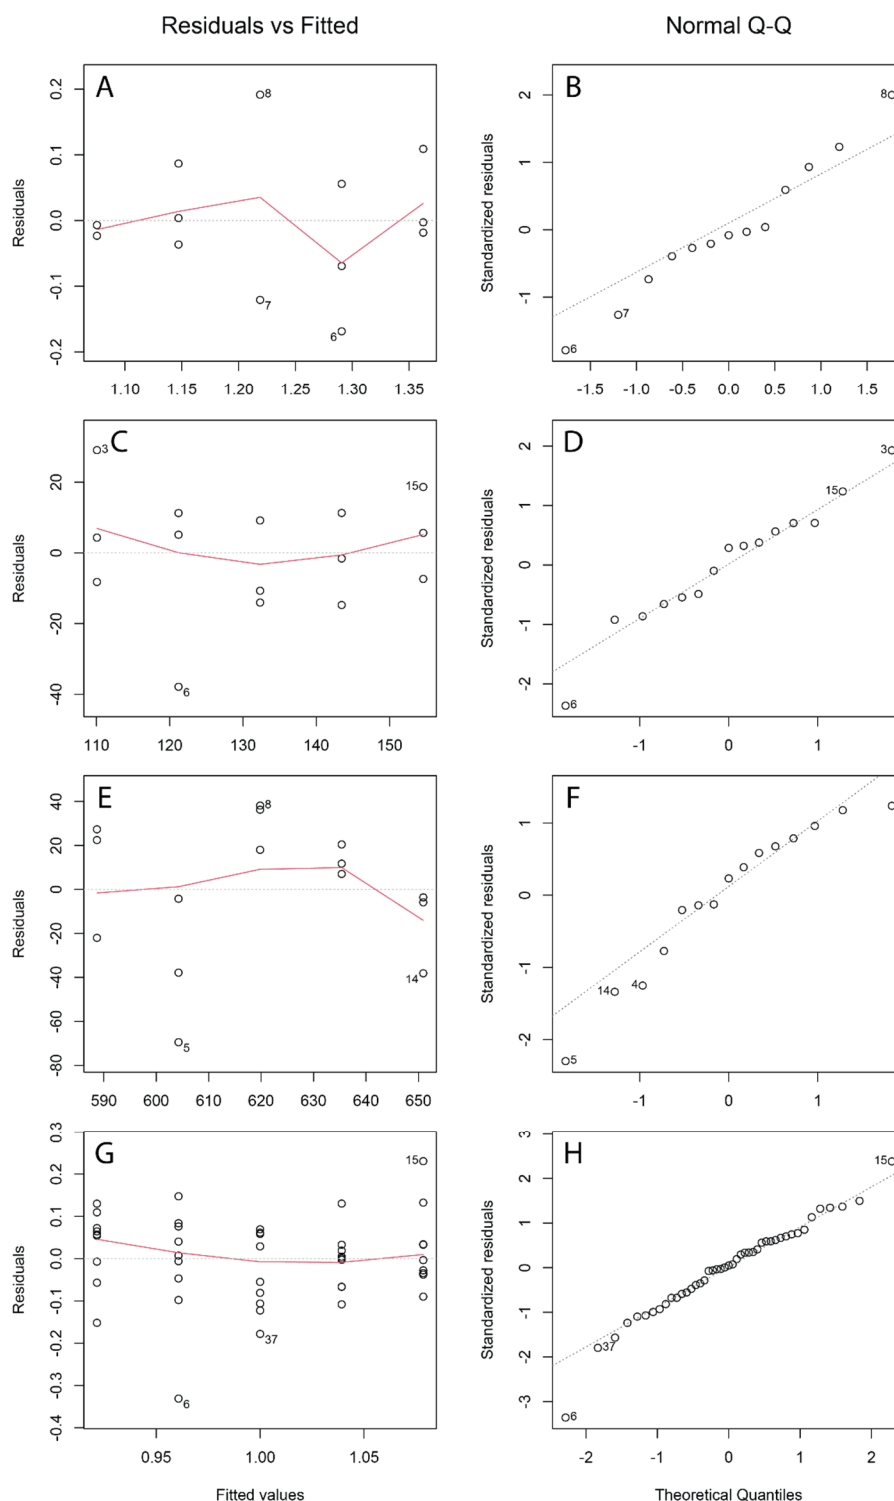

**Figure S1.** Residuals vs. fitted values and Q-Q plots for the models relating Cd concentration in the moss with water flow velocity. Graphs A and B correspond to the model for samples exposed to water with 0 ng g<sup>-1</sup> of Cd, C and D for 4 ng g<sup>-1</sup>, E and F for 16 ng g<sup>-1</sup>, and G and H correspond to the model for the normalized concentrations. The graphs of the residuals vs fitted lines show that, as the red line was not very different from the horizontal line, the data are roughly homoscedastic. The Q-Q plots in the second column show that the residuals are linearly distributed, meaning that the data does not differ greatly from the normality.
